# Supplementary material for: Exploring Hybrid Forecasting Frameworks for Subseasonal Low Flow Predictions in the European Alps
Source: Copernicus journal article supplement (doi:10.5194/egusphere-2025-3411), 2025-09-01
Supplement: Supplementary file 1 [file egusphere-2025-3411-supplement.pdf]

Supplementary material to:

Exploring Hybrid Forecasting Frameworks for Subseasonal Low Flow Predictions in the European Alps

Annie Y.-Y. Chang<sup>1, 2, 3, 6</sup>, Shaun Harrigan<sup>3</sup>, Maria-Helena Ramos<sup>4</sup>, Massimiliano Zappa<sup>1</sup>, Christian M. Grams<sup>5, 6</sup>, Daniela I.V. Domeisen<sup>7, 2</sup>, and Konrad Bogner<sup>1</sup>

<sup>1</sup>Swiss Federal Institute WSL, Birmensdorf, Switzerland  
<sup>2</sup>Institute for Atmospheric and Climate Science, ETH Zurich, Switzerland  
<sup>3</sup>European Centre for Medium-Range Weather Forecasts (ECMWF), Reading, United Kingdom  
<sup>4</sup>Université Paris-Saclay, INRAE, UR HYCAR, Antony, France  
<sup>5</sup>Institute of Meteorology and Climate Research Troposphere Research (IMKTRO), Karlsruhe Institute of Technology (KIT), Karlsruhe, Germany  
<sup>6</sup>now at: Federal Office of Meteorology and Climatology, MeteoSwiss, Zurich Airport, Switzerland  
<sup>7</sup>University of Lausanne, Lausanne, Switzerland

**Correspondence:** Annie Y.-Y. Chang (ychang@ethz.ch)

| Parameter                  | Value                   |
|----------------------------|-------------------------|
| Learning Rate              | 0.001                   |
| Hidden Size                | 128                     |
| LSTM Layers                | 2                       |
| Attention Head Size        | 2                       |
| Dropout                    | 0.1                     |
| Hidden Continuous Size     | 8                       |
| Output Size                | 7 (Number of quantiles) |
| Loss Function              | QuantileLoss()          |
| Logging Frequency          | Every 10 batches        |
| Reduce on Plateau Patience | 4                       |

**Table S1.** Model Architecture for all Temporal Fusion Transformer models trained in this study

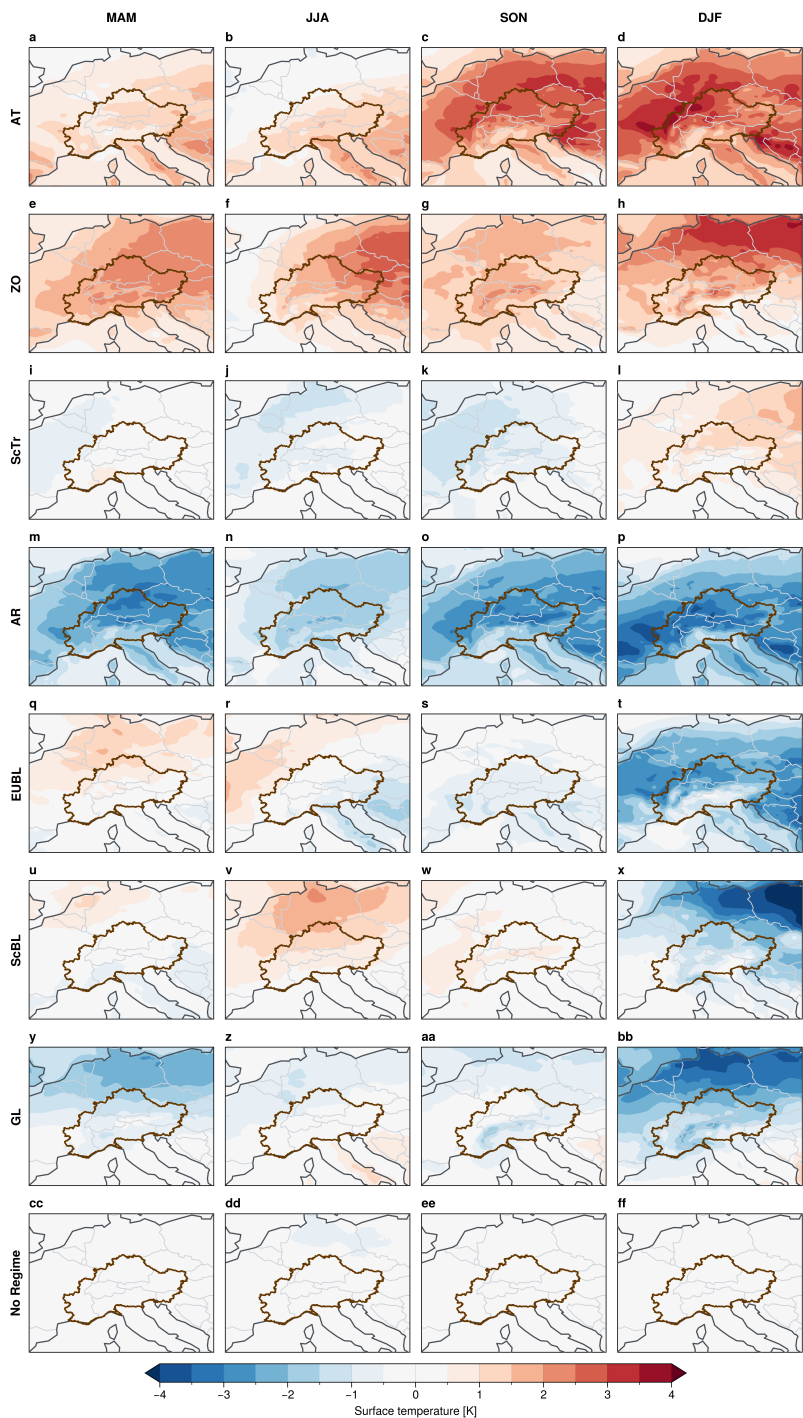

**Figure S1.** ERA5 Temperature anomalies associated with each of the seven weather regimes plus the no-regime. Anomalies computed with respect to climatology between the years 1999 - 2018. AT - Atlantic Trough, ZO - Zonal, ScTr - Scandinavian Trough, AR - Atlantic Ridge, EUBL - European Blocking, ScBL - Scandinavian Blocking, GL - Greenland Blocking.

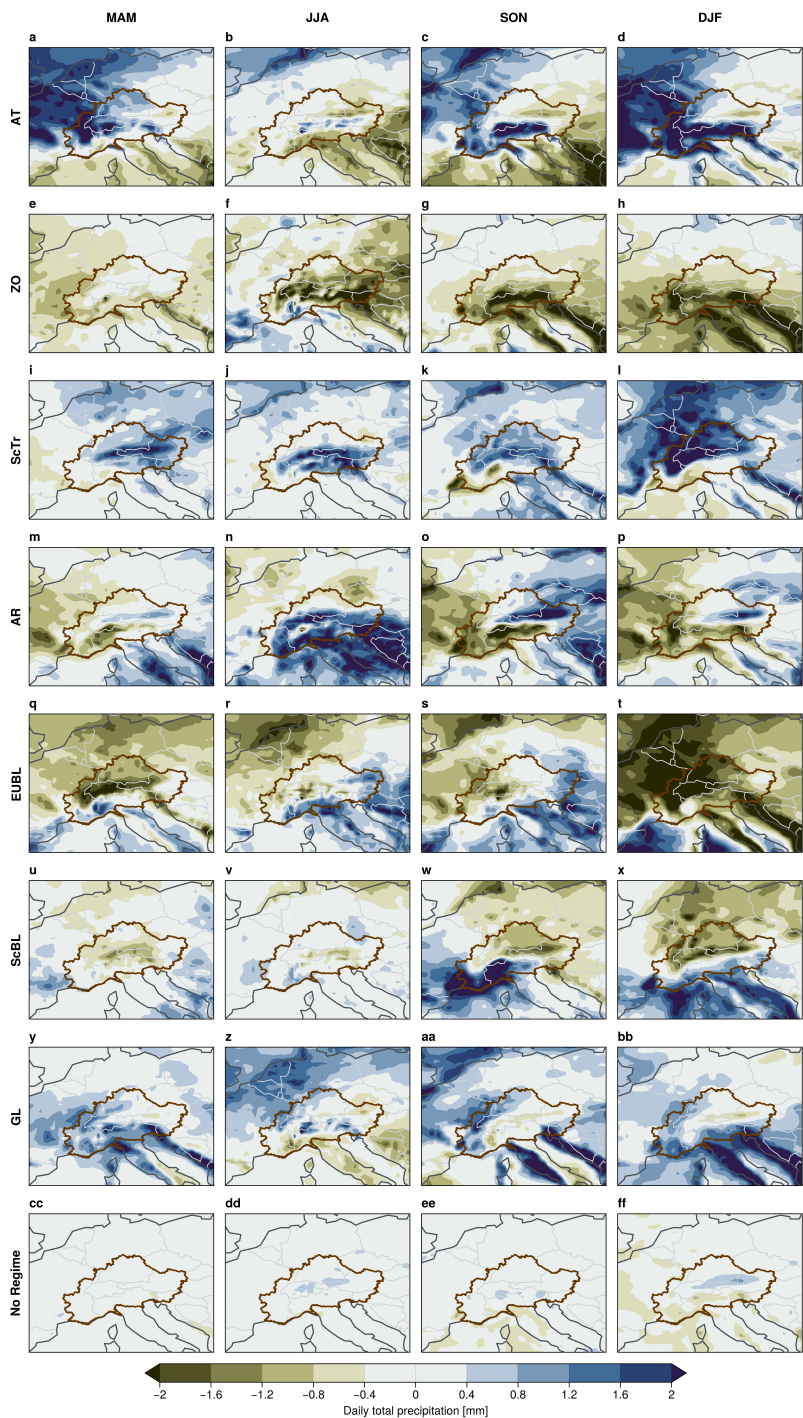

**Figure S2.** ERA5 total precipitation anomalies for each season associated with each of the seven weather regimes plus the no-regime. Anomalies computed with respect to climatology between the years 1999 - 2018. AT - Atlantic Trough, ZO - Zonal, ScTr - Scandinavian Trough, AR - Atlantic Ridge, EUBL - European Blocking, ScBL - Scandinavian Blocking, GL - Greenland Blocking

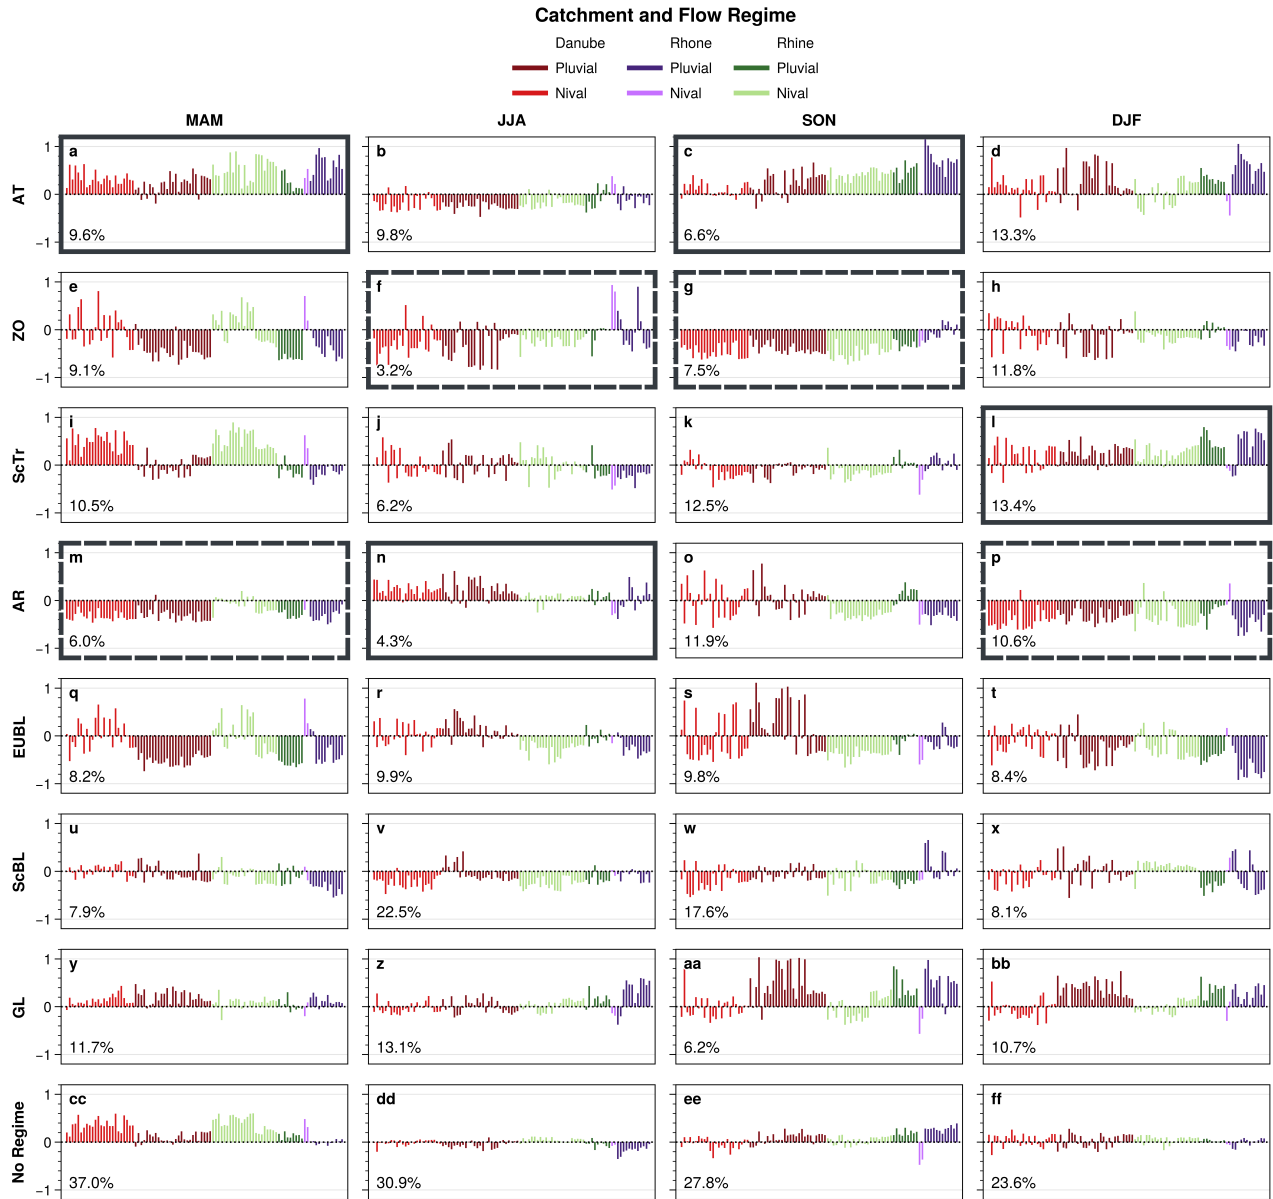

**Figure S3.** Standardized streamflow anomalies associated with seven weather regimes and a no-regime regime, sorted by season. Each line within the panels represents a station, grouped by river basins, which are color-coded (excluding the river Po due to limited data). Within each basin, stations are further divided by flow regime and ordered by catchment area (smallest to largest). A positive streamflow anomaly indicates higher-than-climatology flow, while a negative streamflow anomaly indicates lower-than-climatology flow. For each season, the regimes with the strongest positive and negative anomalies are highlighted with bold and dashed thick borders, respectively. The percentage in the lower-left corner of each panel shows the occurrence frequency of the respective weather regime in the corresponding season. AT - Atlantic Trough, ZO - Zonal, ScTr - Scandinavian Trough, AR - Atlantic Ridge, EUBL - European Blocking, ScBL - Scandinavian Blocking, GL - Greenland Blocking

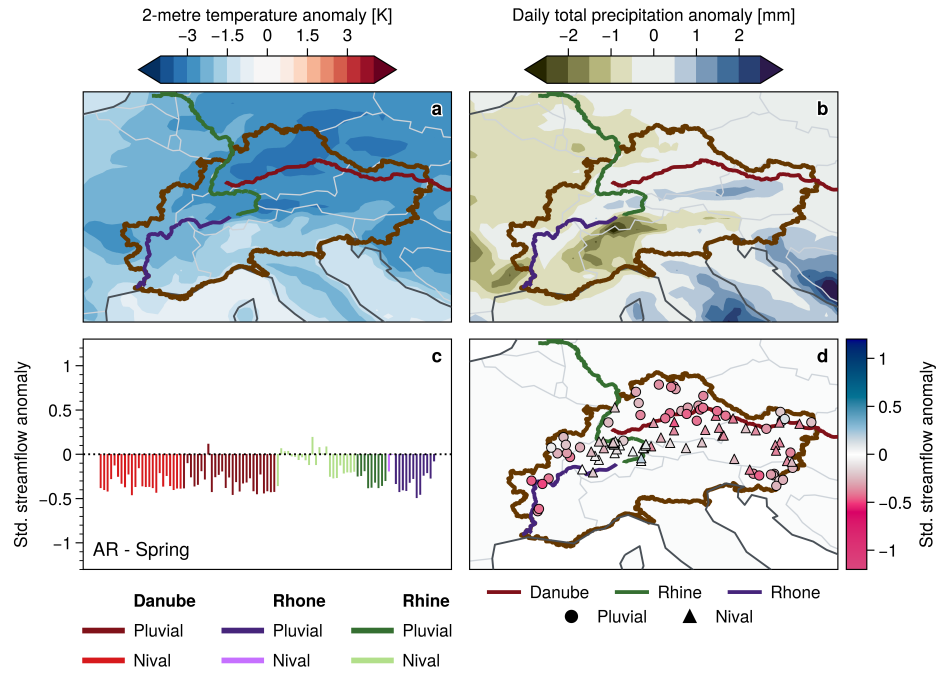

**Figure S4.** Composite of surface weather anomalies and streamflow anomalies during Atlantic Ridge (AR) regime days in spring (March-April-May). Shown in surface temperature (a), daily accumulated total precipitation (b), standardized streamflow anomaly for different stations (c), and standardized streamflow anomalies displayed on a map of the study area. (d).

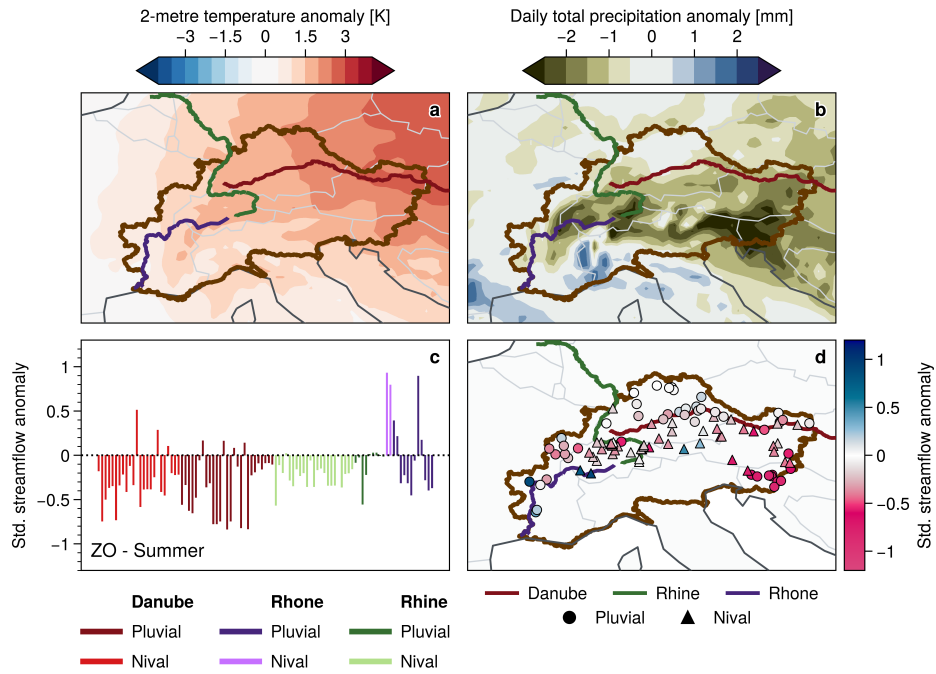

**Figure S5.** Same as Figure S4, but for Zonal (ZO) regime days in summer (June-July-August).

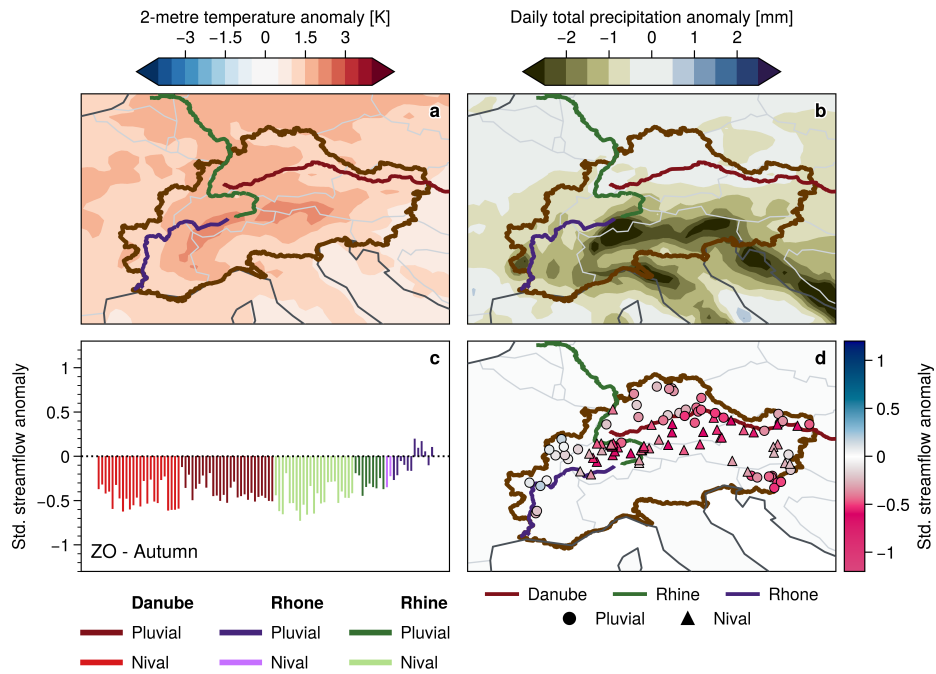

**Figure S6.** Same as Figure S4, but for Zonal (ZO) regime days in autumn (September-October-November).

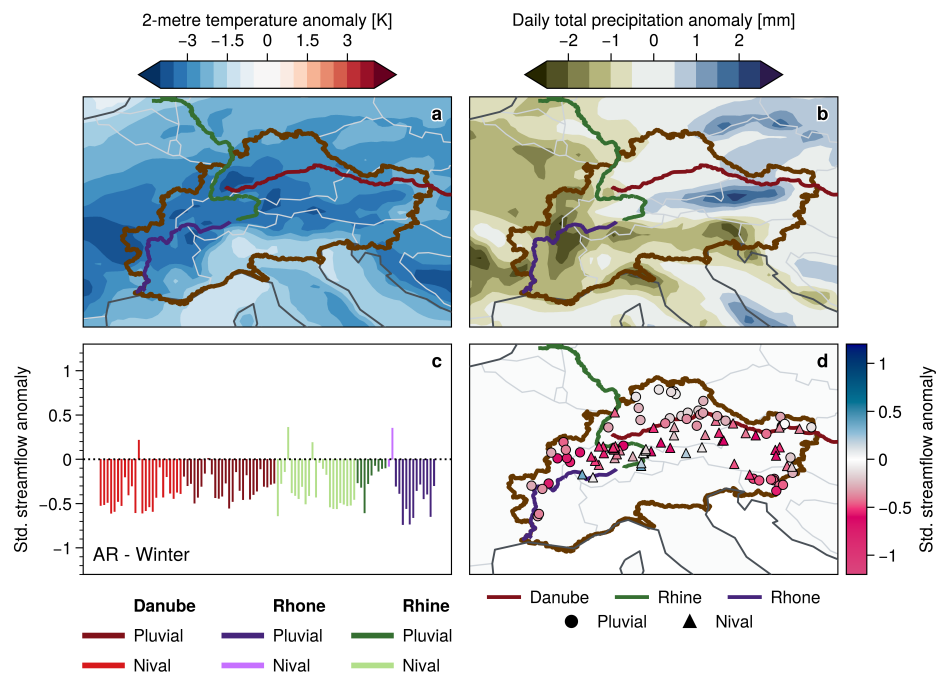

**Figure S7.** Same as Figure S4, but for winter (December-January-February).

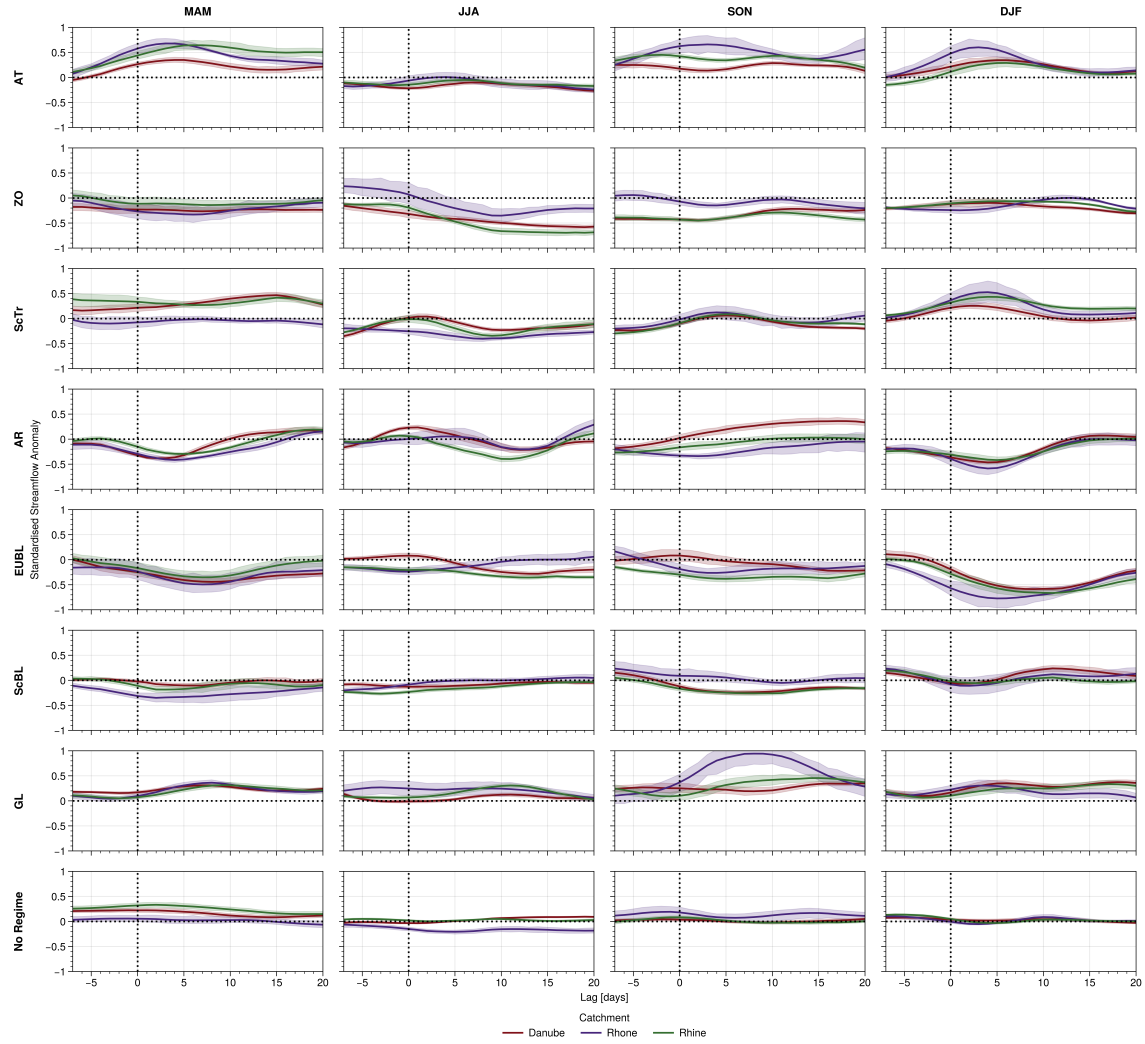

**Figure S8.** Streamflow anomalies associated with each weather regime type as a function of lag. AT - Atlantic Trough, ZO - Zonal, ScTr - Scandinavian Trough, AR - Atlantic Ridge, EUBL - European Blocking, ScBL - Scandinavian Blocking, GL - Greenland Blocking.

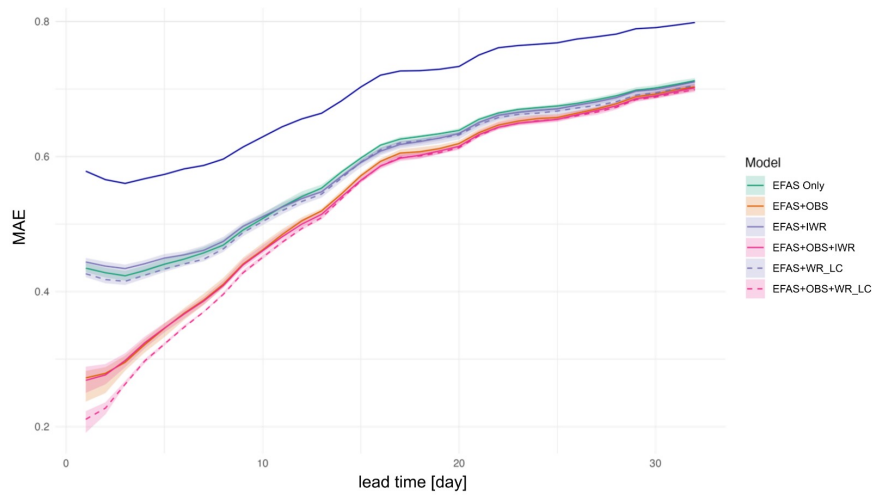

**Figure S9.** CRPSS value averaged over all stations to demonstrate the uncertainty from random seeds. Each model setup is trained on 11 seeds.

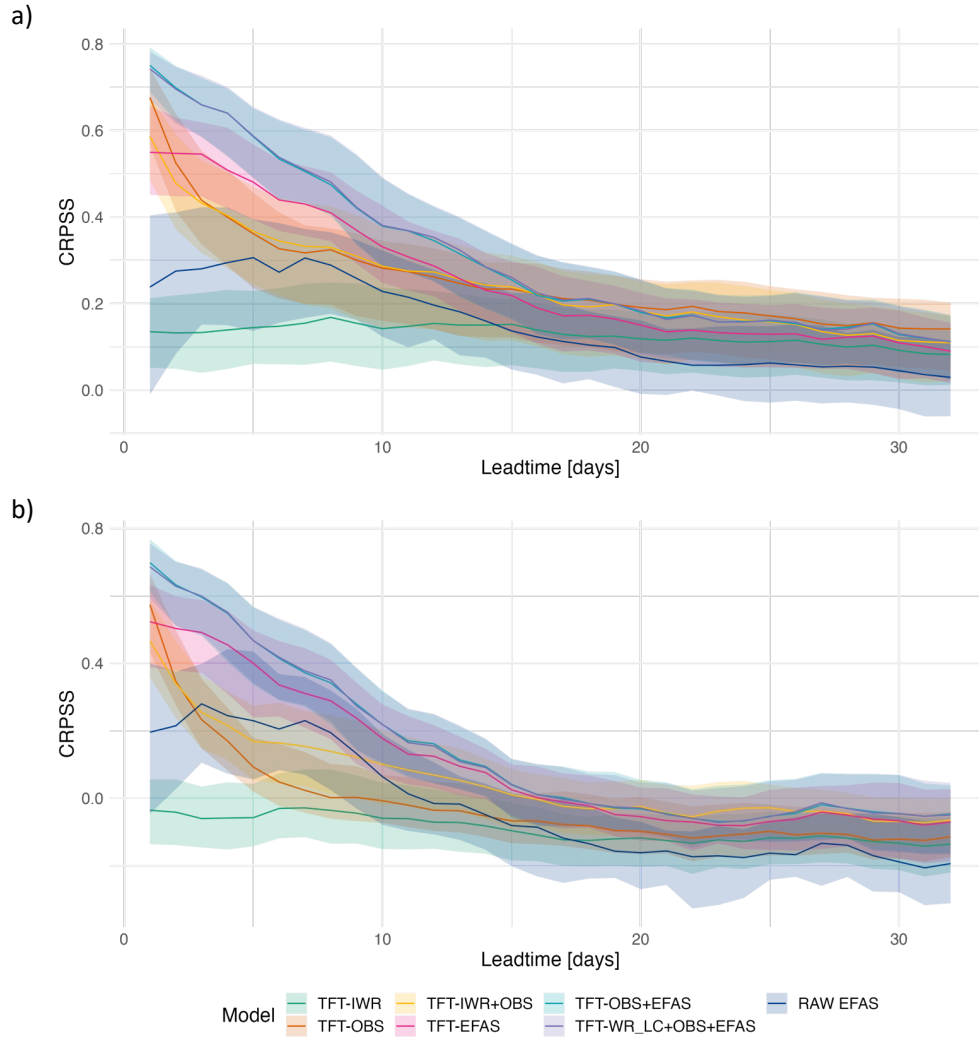

**Figure S10.** Comparison of CRPSS over a 32-day lead time for selected models with various input features. Information on model setup can be found in Table ???. The raw EFAS output, shown in blue, serves as a baseline. The shaded regions represent the interquartile range of CRPSS values across different stations and seeds during the testing period (July 1, 2015 - December 28, 2018). Panel (a) presents results for all initialization days across all stations, while Panel (b) focuses on high flow days only.
